# Supplementary material for: What Levers to Promote Teachers’ Wellbeing during the COVID-19 Pandemic and Beyond: Lessons Learned from a 2021 Online Study in Six Countries
Source: MDPI journal article supplement (doi:10.3390/ijerph19159151), 2022-07-27
Supplement: s1 [file s1]

**Table S1.** Pearson correlations\* between five dimensions of teachers' wellbeing in France (n= 3,646), Québec (n=2,347) and Belgium (n=1,268), 2021 International Barometer of Education Personnel's Health and Wellbeing (I-BEST)

|                          | <b>Job satisfaction</b> | <b>Work/life balance</b> | <b>Subjective health</b> | <b>Mental health</b> | <b>Life satisfaction</b> |
|--------------------------|-------------------------|--------------------------|--------------------------|----------------------|--------------------------|
| <b>Job satisfaction</b>  | 1.00                    |                          |                          |                      |                          |
| <b>Work/life balance</b> | 0.50                    | 1.00                     |                          |                      |                          |
| <b>Subjective health</b> | 0.36                    | 0.35                     | 1.00                     |                      |                          |
| <b>Mental health</b>     | 0.43                    | 0.55                     | 0.38                     | 1.00                 |                          |
| <b>Life satisfaction</b> | 0.50                    | 0.46                     | 0.47                     | 0.50                 | 1.00                     |

\* Weighted statistics taking into account gender and level of education + age group in France and Belgium

**Table S2.** List of the 29 potential determinants of teacher's wellbeing that were considered in the forward stepwise regression procedure in addition of age and gender, 2021 International Barometer of Education Personnel's Health and Wellbeing (I-BEST)

|                             | Name variable                           | Question                                                                                       | Response items                                                                                             | Format in the analysis and reference group                                                                        |
|-----------------------------|-----------------------------------------|------------------------------------------------------------------------------------------------|------------------------------------------------------------------------------------------------------------|-------------------------------------------------------------------------------------------------------------------|
| <b>Private life</b>         |                                         |                                                                                                |                                                                                                            |                                                                                                                   |
|                             | Household partner                       | In your household, you live with partner?                                                      | Yes, no                                                                                                    | 2 categories: yes, no (ref.)                                                                                      |
|                             | Household child(ren)                    | In your household, you live with children?                                                     | Yes, no                                                                                                    | 2 categories: yes, no (ref.)                                                                                      |
|                             | Access to healthcare                    | Are you satisfied with your access to healthcare in your country?                              | Very satisfied, satisfied, neither satisfied nor dissatisfied, dissatisfied, very dissatisfied             | 3 categories: very satisfied/satisfied (ref.), neither satisfied nor dissatisfied, dissatisfied/very dissatisfied |
|                             | Access to training/prevention resources | Do you have access to training and/or prevention resources on health and well-being?           | Yes, no                                                                                                    | 2 categories: yes (ref.), no                                                                                      |
| <b>Professional life</b>    |                                         |                                                                                                |                                                                                                            |                                                                                                                   |
| <i>General factors</i>      | Age of students                         | In your main school, what age group do your students belong to?                                | 3-5 years old, 6-11 years old, 11-15 years old, 16-18 years old                                            | 4 categories: 3-5, 6-11, 11-15, 16-18 years old (ref.)                                                            |
|                             | Seniority                               | How many years have you worked in the education sector? (In total, including the current year) | 1 year, 2 to 4 years, 5 to 9 years, 10 to 14 years, 15 to 19 years, 20 to 30 years, over 30 years          | 3 categories: <5 (ref.), 5-30, >30 years                                                                          |
|                             | Employment status                       | Do you work... ?                                                                               | Full-time, part-time                                                                                       | 2 categories: full-time (ref.), part-time                                                                         |
|                             | Union membership                        | Do you have a membership in a union?                                                           | Yes, no, do not want to answer                                                                             | 3 categories: yes (ref.), no, do not want to answer                                                               |
|                             | Remote work                             | Do you currently teach remotely?                                                               | Yes, totally; yes, partially; no                                                                           | 2 categories: at least partially, no (ref.)                                                                       |
|                             | School sector                           | Your school is...                                                                              | Public, private                                                                                            | 2 categories: public (ref.), private                                                                              |
| <i>Physical environment</i> | School size                             | How many students are in your school?                                                          | Less than 100 students, between 100 and 199 students, between 200 and 799 students, more than 800 students | 4 categories: <100 (ref.), 100-199, 200-799, >800                                                                 |
|                             | School urbanicity                       | Your school is located in an environment that is rather?                                       | 6-point Likert-scale from "A: very urban" to "F: very rural"                                               | 3 categories: urban (A-B) (ref.), intermediate (C-D), rural (E-F)                                                 |
|                             | School facilities                       | Are you satisfied with the school facilities                                                   | 6-point Likert-scale: from "A: very satisfied" to "F: very dissatisfied"                                   | 2 categories: satisfied (A-C) (ref.), unsatisfied (D-F)                                                           |
|                             | Material conditions                     | Are your satisfied with the material conditions (workspaces, teaching materials, Internet)?    | 6-point Likert-scale: from "A: very satisfied" to "F: very dissatisfied"                                   | 2 categories: satisfied (A-C) (ref.), unsatisfied (D-F)                                                           |
|                             | Indoor air quality                      | Are your satisfied with the air quality inside the buildings?                                  | 6-point Likert-scale: from "A: very satisfied" to "F: very dissatisfied"                                   | 2 categories: satisfied (A-C) (ref.), unsatisfied (D-F)                                                           |
|                             | Indoor noise level                      | Are your satisfied with the sound level inside the buildings?                                  | 6-point Likert-scale: from "A: very satisfied" to "F: very dissatisfied"                                   | 2 categories: satisfied (A-C) (ref.), unsatisfied (D-F)                                                           |

|                                           | Name variable                            | Question                                                                                                                | Response items                                                             | Format in the analysis and reference group                            |
|-------------------------------------------|------------------------------------------|-------------------------------------------------------------------------------------------------------------------------|----------------------------------------------------------------------------|-----------------------------------------------------------------------|
| <i>Psychosocial environment</i>           | Feeling of safety at school              | Do you feel safe at your workplace?                                                                                     | Always, most of the time, rarely, not at all                               | 3 categories: always (ref.), most of the time, rarely/not at all      |
|                                           | Victim of violence                       | Have you been the victim of workplace violence in the past 12 months?                                                   | Yes, no                                                                    | 2 categories: yes, no (ref.)                                          |
|                                           | Witness of violence                      | At work, have you witnessed violence in the past 12 months?                                                             | Yes, no                                                                    | 2 categories: yes, no (ref.)                                          |
|                                           | Quality of relationships with students   | In your current work, how do you rate the quality of your relationship with pupils                                      | 6-point Likert scale from “A: very bad” to “F: very good”                  | 3 categories: low, medium, high (ref.) <sup>1</sup>                   |
|                                           |                                          | In your current work, how do you rate the level of disciplinary of pupils                                               | 6-point Likert scale from “A: very bad” to “F: very good”                  |                                                                       |
|                                           | Quality of relationships with colleagues | If needed, in your school, do you get support from your colleagues?                                                     | Yes, no                                                                    | 3 categories: low, medium, strong (ref.) <sup>2</sup>                 |
|                                           |                                          | In your current work, how do you rate the quality of your relationship with your colleagues                             | 6-point Likert scale from “A: very bad” to “F: very good”                  |                                                                       |
|                                           | Quality of relationships with superiors  | If needed, in your school, do you get support from your superiors?                                                      | Yes, no                                                                    | 3 categories: low, medium, strong (ref.) <sup>3</sup>                 |
|                                           |                                          | To what extent are the supervisory authorities concerned with the health and well-being of the staff?                   | Not at all concerned, a little concerned, fairly concerned, very concerned |                                                                       |
|                                           |                                          | Is your work recognized and valued by the school administration and/or superiors?                                       | Yes, always; from time to time; rarely; No, never                          |                                                                       |
| <i>Organization / career perspectives</i> | Autonomy at work                         | How much autonomy do you have in your work?                                                                             | A lot, some, little, zero                                                  | 3 categories: a lot (ref.), some, little/zero                         |
|                                           | Teamwork                                 | In your school, do you make important decisions as a team?                                                              | 6-point Likert scale from “A: always” to “F: never”                        | 2 categories: always-often(A-C) (ref.), rarely-never (D-F)            |
|                                           | Communication                            | At work, are you informed sufficiently in advance about, for example, important decisions, changes, or future projects? | 6-point Likert scale from “A: always” to “F: never”                        | 2 categories: always-often(A-C) (ref.), rarely-never (D-F)            |
|                                           | Societal appreciation                    | I have the impression that being a teacher is valued by society                                                         | Strongly disagree, disagree, agree, strongly agree                         | 2 categories: disagree/strongly disagree, agree/strongly agree (ref.) |
|                                           | Salary                                   | In your current work, how do you rate your salary?                                                                      | 6-point Likert scale from “A: very good” to “F: very bad”                  | 2 categories: satisfied (A-C) (ref.), unsatisfied (D-F)               |
|                                           | Continuing education                     | In your current work, how do you rate the possibilities of training?                                                    | 6-point Likert scale from “A: very good” to “F: very bad”                  | 2 categories: satisfied (A-C) (ref.), unsatisfied (D-F)               |
|                                           | Career progression                       | Evaluation of the possibilities of promotion                                                                            | 6-point Likert scale from “A: very good” to “F: very bad”                  | 2 categories: satisfied (A-C) (ref.), unsatisfied (D-F)               |

<sup>1</sup> A composite score based on the sum of the two 6-point Likert scales and then divided in tertiles; <sup>2</sup> a composite score based on the combination of the two questions and then divided in tertiles. <sup>3</sup> a composite score based on the combination of the three questions and then divided in tertiles.

**Table S3. Factors\* associated with job satisfaction among French, Québec and Belgian teachers, 2021**  
**International Barometer of Education Personnel's Health and Wellbeing (I-BEST)**

| % Job satisfaction#                       |                                    | France<br>13.4% |         | Québec<br>25.3% |         | Belgium<br>27.6% |         |
|-------------------------------------------|------------------------------------|-----------------|---------|-----------------|---------|------------------|---------|
|                                           |                                    | $\beta$         | p-value | $\beta$         | p-value | $\beta$          | p-value |
| <b>Sociodemographic</b>                   |                                    |                 |         |                 |         |                  |         |
| Gender                                    | Men                                | -0.49           | 0.001   |                 |         |                  |         |
|                                           | Women                              | Ref.            |         |                 |         |                  |         |
| <b>Private life</b>                       |                                    |                 |         |                 |         |                  |         |
| Access to healthcare                      | Dissatisfied/very dissatisfied     | -0.74           | 0.001   | -0.37           |         |                  |         |
|                                           | Neither satisfied nor dissatisfied | -0.49           | 0.003   | -0.40           |         |                  |         |
|                                           | Very satisfied/satisfied           | Ref.            |         | Ref.            |         |                  |         |
| <b>Professional life</b>                  |                                    |                 |         |                 |         |                  |         |
| <i>General factors</i>                    |                                    |                 |         |                 |         |                  |         |
| Age of students                           | 3-5                                |                 |         | -0.35           | 0.093   | -0.91            | <0.001  |
|                                           | 6-11                               |                 |         | -0.55           | <0.001  | -0.59            | 0.001   |
|                                           | 11-15                              |                 |         | -0.24           | 0.109   | -0.31            | 0.091   |
|                                           | 16-18 years old                    |                 |         | Ref.            |         | Ref.             |         |
| Seniority                                 | <5                                 | Ref.            |         |                 |         |                  |         |
|                                           | 5-30                               | -0.74           | <0.001  |                 |         |                  |         |
|                                           | > 30 years                         | -0.99           | <0.001  |                 |         |                  |         |
| Employment status                         | Full-time                          |                 |         |                 |         | Ref.             |         |
|                                           | Part-time                          |                 |         |                 |         | -0.58            | 0.011   |
| Union membership                          | Yes                                |                 |         | Ref.            |         |                  |         |
|                                           | No                                 |                 |         | -1.17           | 0.006   |                  |         |
|                                           | Do not want to answer              |                 |         | 0.58            | 0.338   |                  |         |
| <i>Physical environment</i>               |                                    |                 |         |                 |         |                  |         |
| Material conditions                       | Unsatisfied (D-F)                  | -0.33           | 0.003   |                 |         |                  |         |
|                                           | Satisfied (A-C)                    | Ref.            |         |                 |         |                  |         |
| Indoor air quality                        | Unsatisfied (D-F)                  |                 |         | 0.34            | 0.002   |                  |         |
|                                           | Satisfied (A-C)                    |                 |         | Ref.            |         |                  |         |
| <i>Psychosocial environment</i>           |                                    |                 |         |                 |         |                  |         |
| Feeling of safety at school               | Rarely/not at all                  | -1.49           | <0.001  |                 |         | -0.74            | 0.009   |
|                                           | Most of the time                   | -0.39           | <0.001  |                 |         | -0.39            | 0.011   |
|                                           | Always                             | Ref.            |         |                 |         | Ref.             |         |
| Victim of violence                        | Yes                                | -0.30           | 0.025   |                 |         |                  |         |
|                                           | No                                 | Ref.            |         |                 |         |                  |         |
| Quality of relationships with students    | Low                                | -1.05           | <0.001  | -0.93           | <0.001  | -0.93            | <0.001  |
|                                           | Medium                             | -0.49           | <0.001  | -0.23           | 0.038   | -0.59            | 0.001   |
|                                           | Strong                             | Ref.            |         | Ref.            |         | Ref.             |         |
| Quality of relationships with superiors   | Low                                | -0.70           | <0.001  | -0.50           | 0.002   | -0.63            | <0.001  |
|                                           | Medium                             | -0.37           | 0.006   | -0.30           | 0.025   | -0.39            | 0.028   |
|                                           | Strong                             | Ref.            |         | Ref.            |         | Ref.             |         |
| <b>Organization / career perspectives</b> |                                    |                 |         |                 |         |                  |         |
| Autonomy at work                          | Little/zero                        | -0.59           | 0.032   | -0.99           | <0.001  | -1.08            | <0.001  |
|                                           | Some                               | -0.49           | <0.001  | -0.40           | <0.001  | -0.67            | <0.001  |
|                                           | A lot                              | Ref.            |         | Ref.            |         | Ref.             |         |
| Societal appreciation                     | Disagree/strongly disagree         | -0.74           | 0.004   | -1.03           | <0.001  |                  |         |

| % Job satisfaction#         |                          | France<br>13.4% |         | Québec<br>25.3% |         | Belgium<br>27.6% |         |
|-----------------------------|--------------------------|-----------------|---------|-----------------|---------|------------------|---------|
|                             |                          | $\beta$         | p-value | $\beta$         | p-value | $\beta$          | p-value |
| <i>Agree/strongly agree</i> |                          | Ref.            |         | Ref.            |         |                  |         |
| Salary                      | <i>Unsatisfied (D-F)</i> | -0.81           | <0.001  | -0.40           | <0.001  | -0.87            | <0.001  |
|                             | <i>Satisfied (A-C)</i>   | Ref.            |         | Ref.            |         | Ref.             |         |
| Continuing education        | <i>Unsatisfied (D-F)</i> |                 |         | -0.33           | 0.008   |                  |         |
|                             | <i>Satisfied (A-C)</i>   |                 |         | Ref.            |         |                  |         |
| Career progression          | <i>Unsatisfied (D-F)</i> | -0.77           | <0.001  |                 |         | -0.48            | 0.002   |
|                             | <i>Satisfied (A-C)</i>   | Ref.            |         |                 |         | Ref.             |         |

# Weighted statistics taking into account gender and level of education + age group in France and Belgium

\*Covariates that were not selected by the forward stepwise logistic regression procedure in any of the 3 country models of job satisfaction: age, household partner, household child(ren), access to training/prevention resources, remote work, school sector / school size, school urbanicity, school facilities, indoor noise level / witness of violence, quality of relationships with colleagues /teamwork, communication

**Table S4. Factors\* associated with poor work/life balance among French, Québec and Belgian teachers, 2021**  
**International Barometer of Education Personnel's Health and Wellbeing (I-BEST)**

| % Poor work/life balance#                 |                                    | France<br>14.6% |         | Québec<br>8.0% |         | Belgium<br>9.2% |         |
|-------------------------------------------|------------------------------------|-----------------|---------|----------------|---------|-----------------|---------|
|                                           |                                    | $\beta$         | p-value | $\beta$        | p-value | $\beta$         | p-value |
| <b>Sociodemographic</b>                   |                                    |                 |         |                |         |                 |         |
| <b>Age</b>                                |                                    | -0.01           | 0.045   |                |         |                 |         |
| Gender                                    | Men                                |                 |         | -0.56          | 0.024   |                 |         |
|                                           | Women                              |                 |         | Ref.           |         |                 |         |
| <b>Private life</b>                       |                                    |                 |         |                |         |                 |         |
| Household child(ren)                      | Yes                                | -0.24           | 0.019   | -0.33          | 0.042   |                 |         |
|                                           | No                                 | Ref.            |         | Ref.           |         |                 |         |
| Access to healthcare                      | Dissatisfied/very dissatisfied     | 0.45            | 0.001   | 0.48           | 0.017   |                 |         |
|                                           | Neither satisfied nor dissatisfied | 0.14            | 0.282   | 0.46           | 0.019   |                 |         |
|                                           | Very satisfied/satisfied           | Ref.            |         | Ref.           |         |                 |         |
| <b>Professional life</b>                  |                                    |                 |         |                |         |                 |         |
| <i>General factors</i>                    |                                    |                 |         |                |         |                 |         |
| School sector                             | Public                             |                 |         | Ref.           |         |                 |         |
|                                           | Private                            |                 |         | 1.20           | 0.029   |                 |         |
| School urbanicity                         | Urban (A-B)                        | Ref.            |         |                |         |                 |         |
|                                           | Intermediate (C-D)                 | -0.06           | 0.636   |                |         |                 |         |
|                                           | Rural (E-F)                        | 0.36            | 0.004   |                |         |                 |         |
| <i>Physical environment</i>               |                                    |                 |         |                |         |                 |         |
| Material conditions                       | Unsatisfied (D-F)                  | 0.32            | 0.002   |                |         |                 |         |
|                                           | Satisfied (A-C)                    | Ref.            |         |                |         |                 |         |
| <i>Psychosocial environment</i>           |                                    |                 |         |                |         |                 |         |
| Feeling of safety at school               | Rarely/not at all                  | 0.59            | 0.001   | 0.94           | 0.002   | 0.98            | 0.002   |
|                                           | Most of the time                   | 0.01            | 0.917   | 0.43           | 0.036   | -0.02           | 0.935   |
|                                           | Always                             | Ref.            |         | Ref.           |         | Ref.            |         |
| Victim of violence                        | Yes                                | 0.30            | 0.005   |                |         |                 |         |
|                                           | No                                 | Ref.            |         |                |         |                 |         |
| Quality of relationships with students    | Low                                | 0.51            | <0.001  | 0.54           | 0.006   |                 |         |
|                                           | Medium                             | 0.16            | 0.270   | -0.32          | 0.125   |                 |         |
|                                           | Strong                             | Ref.            |         | Ref.           |         |                 |         |
| Quality of relationships with colleagues  | Low                                | 0.18            | 0.134   |                |         | 0.24            | 0.368   |
|                                           | Medium                             | -0.35           | 0.007   |                |         | -0.83           | 0.012   |
|                                           | Strong                             | Ref.            |         |                |         | Ref.            |         |
| Quality of relationships with superiors   | Low                                | 1.77            | 0.004   | 0.68           | 0.003   | 0.91            | 0.003   |
|                                           | Medium                             | 1.27            | 0.235   | 0.63           | 0.003   | 0.64            | 0.059   |
|                                           | Strong                             | Ref.            |         | Ref.           |         | Ref.            |         |
| <b>Organization / career perspectives</b> |                                    |                 |         |                |         |                 |         |
| Autonomy at work                          | Little/zero                        | 0.58            | 0.001   |                |         |                 |         |
|                                           | Some                               | 0.03            | 0.797   |                |         |                 |         |
|                                           | A lot                              | Ref.            |         |                |         |                 |         |
| Teamwork                                  | Rarely-never (D-F)                 |                 |         | 0.53           | 0.003   |                 |         |
|                                           | Always-often (A-C)                 |                 |         | Ref.           |         |                 |         |
| Communication                             | Rarely-never (D-F)                 | 0.27            | 0.028   |                |         |                 |         |

|                           |                           | France  |         | Québec  |         | Belgium |         |
|---------------------------|---------------------------|---------|---------|---------|---------|---------|---------|
| % Poor work/life balance# |                           | 14.6%   |         | 8.0%    |         | 9.2%    |         |
|                           |                           | $\beta$ | p-value | $\beta$ | p-value | $\beta$ | p-value |
|                           | <i>Always-often (A-C)</i> | Ref.    |         |         |         |         |         |
| Salary                    | <i>Unsatisfied (D-F)</i>  | 0.34    | 0.048   | 0.50    | 0.004   | 0.52    | 0.013   |
|                           | <i>Satisfied (A-C)</i>    | Ref.    |         | Ref.    |         | Ref.    |         |
| Continuing education      | <i>Unsatisfied (D-F)</i>  | 0.33    | 0.022   |         |         |         |         |
|                           | <i>Satisfied (A-C)</i>    | Ref.    |         |         |         |         |         |
| Career progression        | <i>Unsatisfied (D-F)</i>  | 0.76    | 0.017   |         |         |         |         |
|                           | <i>Satisfied (A-C)</i>    | Ref.    |         |         |         |         |         |

# Weighted statistics taking into account gender and level of education + age group in France and Belgium

\*Covariates that were not selected by the forward stepwise logistic regression procedure in any of the 3 country models of poor work/life balance: Household partner, Access to training/prevention resource, Age of students, Seniority, Employment status, Union membership, Remote work / School size, School facilities, Indoor air quality, Indoor noise level / Witness of violence / Societal appreciation

**Table S5. Factors\* associated with poor subjective health among French, Québec, and Belgian teachers, 2021**  
**International Barometer of Education Personnel's Health and Wellbeing (I-BEST)**

| % Poor subjective health#                |                                           | France<br>17.5% |         | Québec<br>7.2% |         | Belgium<br>14.4% |         |
|------------------------------------------|-------------------------------------------|-----------------|---------|----------------|---------|------------------|---------|
|                                          |                                           | $\beta$         | p-value | $\beta$        | p-value | $\beta$          | p-value |
| <b>Sociodemographic</b>                  |                                           |                 |         |                |         |                  |         |
| <b>Age</b>                               |                                           | 0.03            | <0.001  |                |         | 0.03             | 0.003   |
| <b>Private life</b>                      |                                           |                 |         |                |         |                  |         |
| Household partner                        | Yes                                       |                 |         |                |         | -0.44            | 0.019   |
|                                          | No                                        |                 |         |                |         | Ref.             |         |
| Access to healthcare                     | <i>Dissatisfied/very dissatisfied</i>     | 0.42            | 0.001   | 0.78           | <0.001  | 1.22             | 0.001   |
|                                          | <i>Neither satisfied nor dissatisfied</i> | 0.28            | 0.015   | 0.77           | <0.001  | 0.49             | 0.020   |
|                                          | <i>Very satisfied/satisfied</i>           | Ref.            |         |                |         |                  |         |
| Access to training/prevention resources  | No                                        | 0.36            | 0.019   |                |         |                  |         |
|                                          | Yes                                       | Ref.            |         |                |         |                  |         |
| <b>Professional life</b>                 |                                           |                 |         |                |         |                  |         |
| <i>General factors</i>                   |                                           |                 |         |                |         |                  |         |
| Age of students                          | 3-5                                       |                 |         |                |         | 0.02             | 0.937   |
|                                          | 6-11                                      |                 |         |                |         | -0.56            | 0.023   |
|                                          | 11-15                                     |                 |         |                |         | 0.29             | 0.173   |
|                                          | 16-18 years old                           |                 |         |                |         | Ref.             |         |
| Employment status                        | <i>Full-time</i>                          | Ref.            |         | Ref.           |         |                  |         |
|                                          | <i>Part-time</i>                          | 0.39            | 0.009   | 0.99           | <0.001  |                  |         |
| Union membership                         | Yes                                       | Ref.            |         |                |         |                  |         |
|                                          | No                                        | -0.02           | 0.820   |                |         |                  |         |
|                                          | <i>Do not want to answer</i>              | 0.49            | 0.006   |                |         |                  |         |
| School sector                            | <i>Public</i>                             | Ref.            |         |                |         |                  |         |
|                                          | <i>Private</i>                            | 0.39            | 0.035   |                |         |                  |         |
| School size                              | < 100                                     |                 |         | Ref.           |         |                  |         |
|                                          | 100-199                                   |                 |         | -0.63          | 0.100   |                  |         |
|                                          | 200-799                                   |                 |         | -0.88          | 0.007   |                  |         |
|                                          | > 800                                     |                 |         | -0.85          | 0.015   |                  |         |
| <i>Physical environment</i>              |                                           |                 |         |                |         |                  |         |
| Material conditions                      | <i>Unsatisfied (D-F)</i>                  | 0.19            | 0.054   |                |         |                  |         |
|                                          | <i>Satisfied (A-C)</i>                    | Ref.            |         |                |         |                  |         |
| Indoor noise level                       | <i>Unsatisfied (D-F)</i>                  | 0.20            | 0.047   |                |         | 0.48             | 0.011   |
|                                          | <i>Satisfied (A-C)</i>                    | Ref.            |         |                |         | Ref.             |         |
| <i>Psychosocial environment</i>          |                                           |                 |         |                |         |                  |         |
| Feeling of safety at school              | <i>Rarely/not at all</i>                  | 0.71            | <0.001  | 1.24           | <0.001  | 0.95             | 0.001   |
|                                          | <i>Most of the time</i>                   | 0.25            | 0.037   | 0.56           | 0.013   | 0.44             | 0.070   |
|                                          | <i>Always</i>                             | Ref.            |         | Ref.           |         | Ref.             |         |
| Victim of violence                       | Yes                                       | 0.29            | 0.003   |                |         | 0.40             | 0.029   |
|                                          | No                                        | Ref.            |         |                |         | ref.             |         |
| Quality of relationships with students   | <i>Low</i>                                | 0.62            | <0.001  |                |         |                  |         |
|                                          | <i>Medium</i>                             | 0.30            | 0.032   |                |         |                  |         |
|                                          | <i>Strong</i>                             | Ref.            |         |                |         |                  |         |
| Quality of relationships with colleagues | <i>Low</i>                                | 0.45            | <0.001  | 0.71           | 0.001   | 0.94             | <0.001  |
|                                          | <i>Medium</i>                             | -0.15           | 0.233   | 0.28           | 0.187   | 0.14             | 0.625   |



| % Poor subjective health#                 |                          | France<br>17.5% |         | Québec<br>7.2% |         | Belgium<br>14.4% |         |
|-------------------------------------------|--------------------------|-----------------|---------|----------------|---------|------------------|---------|
|                                           |                          | $\beta$         | p-value | $\beta$        | p-value | $\beta$          | p-value |
| Quality of relationships with superiors   | <i>Strong</i>            | Ref.            |         | Ref.           |         |                  |         |
|                                           | <i>Low</i>               | 0.42            | 0.006   | 0.65           | 0.004   |                  |         |
|                                           | <i>Medium</i>            | 0.09            | 0.563   | 0.39           | 0.069   |                  |         |
|                                           | <i>Strong</i>            | Ref.            |         | Ref.           |         |                  |         |
| <b>Organization / career perspectives</b> |                          |                 |         |                |         |                  |         |
| Autonomy at work                          | <i>Little/zero</i>       | 0.39            | 0.019   | 0.72           | 0.014   | 0.80             | 0.003   |
|                                           | <i>Some</i>              | 0.01            | 0.951   | 0.42           | 0.051   | 0.38             | 0.096   |
|                                           | <i>A lot</i>             | Ref.            |         | Ref.           |         | Ref.             |         |
| Career progression                        | <i>Unsatisfied (D-F)</i> |                 |         | 0.48           | 0.009   |                  |         |
|                                           | <i>Satisfied (A-C)</i>   |                 |         | Ref.           |         |                  |         |

# Weighted statistics taking into account gender and level of education + age group in France and Belgium

\*Covariates that were not selected by the forward stepwise logistic regression procedure in any of the 3 country models of poor health:  
Gender, Household child(ren), Seniority, Remote work / School urbanicity, School facilities, Indoor air quality / Witness of violence /  
Teamwork, Communication, Societal appreciation, Salary, Continuing education

**Table S6. Factors\* associated with poor mental health among French, Québec, and Belgian teachers, 2021 International Barometer of Education Personnel's Health and Wellbeing (I-BEST)**

| % Poor mental health#                     |                                    | France<br>51.4% |         | Québec<br>35.3% |         | Belgium<br>45.5% |         |
|-------------------------------------------|------------------------------------|-----------------|---------|-----------------|---------|------------------|---------|
|                                           |                                    | $\beta$         | p-value | $\beta$         | p-value | $\beta$          | p-value |
| <b>Sociodemographic</b>                   |                                    |                 |         |                 |         |                  |         |
| Age                                       |                                    | -0.01           | 0.013   | -0.02           | <0.001  |                  |         |
| Gender                                    | Men                                | -0.19           | 0.033   | -0.29           | 0.031   |                  |         |
|                                           | Women                              | Ref.            |         | Ref.            |         |                  |         |
| <b>Private life</b>                       |                                    |                 |         |                 |         |                  |         |
| Household partner                         | Yes                                |                 |         |                 |         | -0.39            | 0.006   |
|                                           | No                                 |                 |         |                 |         | Ref.             |         |
| Household child(ren)                      | Yes                                | -0.23           | 0.002   | -0.22           | 0.022   |                  |         |
|                                           | No                                 | Ref.            |         | Ref.            |         |                  |         |
| Access to healthcare                      | Dissatisfied/very dissatisfied     | 0.32            | 0.004   | 0.33            | 0.010   |                  |         |
|                                           | Neither satisfied nor dissatisfied | 0.01            | 0.934   | 0.48            | <0.001  |                  |         |
|                                           | Very satisfied/satisfied           | Ref.            |         | Ref.            |         |                  |         |
| Access to training/prevention resources   | No                                 | 0.49            | <0.001  |                 |         | 0.44             | 0.025   |
|                                           | Yes                                | Ref.            |         |                 |         | Ref.             |         |
| <b>Professional life</b>                  |                                    |                 |         |                 |         |                  |         |
| <i>General factors</i>                    |                                    |                 |         |                 |         |                  |         |
| Employment status                         | Full-time                          |                 |         | Ref.            |         |                  |         |
|                                           | Part-time                          |                 |         | 0.30            | 0.032   |                  |         |
| School sector                             | Public                             |                 |         | Ref.            |         |                  |         |
|                                           | Private                            |                 |         | 0.93            | 0.021   |                  |         |
| <i>Psychosocial environment</i>           |                                    |                 |         |                 |         |                  |         |
| Feeling of safety at school               | Rarely/not at all                  | 0.91            | <0.001  | 1.09            | <0.001  | 1.23             | <0.001  |
|                                           | Most of the time                   | 0.17            | 0.032   | 0.35            | 0.001   | 0.47             | 0.001   |
|                                           | Always                             | Ref.            |         | Ref.            |         | Ref.             |         |
| Victim of violence                        | Yes                                | 0.37            | <0.001  |                 |         | 0.41             | 0.005   |
|                                           | No                                 | Ref.            |         |                 |         | ref.             |         |
| Witness of violence                       | Yes                                |                 |         | 0.25            | 0.009   |                  |         |
|                                           | No                                 |                 |         | Ref.            |         |                  |         |
| Quality of relationships with students    | Low                                | 0.61            | <0.001  | 0.59            | <0.001  | 0.35             | 0.040   |
|                                           | Medium                             | 0.14            | 0.137   | 0.27            | 0.014   | -0.00            | 0.999   |
|                                           | Strong                             | Ref.            |         | Ref.            |         | Ref.             |         |
| Quality of relationships with colleagues  | Low                                | 0.25            | 0.009   |                 |         | 0.47             | 0.005   |
|                                           | Medium                             | -0.05           | 0.583   |                 |         | 0.10             | 0.554   |
|                                           | Strong                             | Ref.            |         | Ref.            |         | Ref.             |         |
| Quality of relationships with superiors   | Low                                | 0.24            | 0.027   | 0.70            | <0.001  | 0.44             | 0.006   |
|                                           | Medium                             | 0.15            | 0.151   | 0.36            | 0.001   | 0.34             | 0.039   |
|                                           | Strong                             | Ref.            |         | Ref.            |         | Ref.             |         |
| <b>Organization / career perspectives</b> |                                    |                 |         |                 |         |                  |         |
| Autonomy at work                          | Little/zero                        | 0.58            | <0.001  |                 |         | 0.67             | 0.002   |
|                                           | Some                               | 0.21            | 0.007   |                 |         | 0.19             | 0.201   |
|                                           | A lot                              | Ref.            |         |                 |         | Ref.             |         |

| % Poor mental health# |                                   | France<br>51.4% |         | Québec<br>35.3% |         | Belgium<br>45.5% |         |
|-----------------------|-----------------------------------|-----------------|---------|-----------------|---------|------------------|---------|
|                       |                                   | $\beta$         | p-value | $\beta$         | p-value | $\beta$          | p-value |
| Teamwork              | <i>Rarely-never (D-F)</i>         | 0.20            | 0.014   |                 |         |                  |         |
|                       | <i>Always-often (A-C)</i>         | Ref.            |         |                 |         |                  |         |
| Communication         | <i>Rarely-never (D-F)</i>         | 0.18            | 0.031   |                 |         |                  |         |
|                       | <i>Always-often (A-C)</i>         | Ref.            |         |                 |         |                  |         |
| Societal appreciation | <i>Disagree/strongly disagree</i> |                 |         | 0.37            | 0.047   |                  |         |
|                       | <i>Agree/strongly agree</i>       |                 |         | Ref.            |         |                  |         |
| Continuing education  | <i>Unsatisfied (D-F)</i>          | 0.32            | <0.001  |                 |         |                  |         |
|                       | <i>Satisfied (A-C)</i>            | Ref.            |         |                 |         |                  |         |
| Career progression    | <i>Unsatisfied (D-F)</i>          |                 |         | 0.31            | 0.001   | 0.30             | 0.042   |
|                       | <i>Satisfied (A-C)</i>            |                 |         | Ref.            |         | Ref.             |         |

# Weighted statistics taking into account gender and level of education + age group in France and Belgium

\*Covariates that were not selected by the forward stepwise logistic regression procedure in any of the 3 country models of poor mental health: Age of students, Seniority, Union membership, Remote work / School size, School urbanicity, School facilities, Material conditions, Indoor air quality, Indoor noise level / Salary

**Table S7. Factors\* associated with life satisfaction among French, Québec, and Belgian teachers, 2021 International Barometer of Education Personnel's Health and Wellbeing (I-BEST)**

| % Life satisfaction#                     |                                    | France<br>22.1% |         | Québec<br>42.6% |         | Belgium<br>29.2% |         |
|------------------------------------------|------------------------------------|-----------------|---------|-----------------|---------|------------------|---------|
|                                          |                                    | β               | p-value | β               | p-value | β                | p-value |
| Sociodemographic                         |                                    |                 |         |                 |         |                  |         |
| Age                                      |                                    |                 |         |                 |         | -0.02            | 0.010   |
| Gender                                   | Men                                |                 |         | 0.33            | 0.009   |                  |         |
|                                          | Women                              |                 |         | Ref.            |         |                  |         |
| Private life                             |                                    |                 |         |                 |         |                  |         |
| Household partner                        | Yes                                | 0.29            | 0.011   | 0.37            | 0.001   |                  |         |
|                                          | No                                 | Ref.            |         | ref.            |         |                  |         |
| Household child(ren)                     | Yes                                | 0.22            | 0.023   |                 |         |                  |         |
|                                          | No                                 | Ref.            |         |                 |         |                  |         |
| Access to healthcare                     | Dissatisfied/very dissatisfied     | -0.72           | <0.001  | -0.44           | 0.001   | 0.72             | 0.058   |
|                                          | Neither satisfied nor dissatisfied | -0.63           | <0.001  | -0.72           | <0.001  | -0.88            | <0.001  |
|                                          | Very satisfied/satisfied           | Ref.            |         | Ref.            |         | Ref.             |         |
| Access to training/prevention resources  | No                                 | -0.34           | 0.003   | -0.18           | 0.050   | -0.55            | 0.006   |
|                                          | Yes                                | Ref.            |         | Ref.            |         | Ref.             |         |
| Professional life                        |                                    |                 |         |                 |         |                  |         |
| General factors                          |                                    |                 |         |                 |         |                  |         |
| Employment status                        | Full-time                          | Ref.            |         |                 |         |                  |         |
|                                          | Part-time                          | 0.29            | 0.038   |                 |         |                  |         |
| Remote work                              | At least partially                 |                 |         |                 |         | 0.35             | 0.032   |
|                                          | No                                 |                 |         |                 |         | Ref.             |         |
| Physical environment                     |                                    |                 |         |                 |         |                  |         |
| Material conditions                      | Unsatisfied (D-F)                  | -0.30           | 0.001   |                 |         |                  |         |
|                                          | Satisfied (A-C)                    | Ref.            |         |                 |         |                  |         |
| Indoor noise level                       | Unsatisfied (D-F)                  |                 |         | -0.21           | 0.038   |                  |         |
|                                          | Satisfied (A-C)                    |                 |         | Ref.            |         |                  |         |
| Psychosocial environment                 |                                    |                 |         |                 |         |                  |         |
| Feeling of safety at school              | Rarely/not at all                  | -1.19           | <0.001  | -0.37           | 0.141   | -1.32            | <0.001  |
|                                          | Most of the time                   | -0.29           | 0.002   | -0.33           | 0.001   | -0.63            | <0.001  |
|                                          | Always                             | Ref.            |         | Ref.            |         | Ref.             |         |
| Victim of violence                       | Yes                                | -0.31           | 0.004   |                 |         | -0.37            | 0.046   |
|                                          | No                                 | Ref.            |         |                 |         | Ref.             |         |
| Quality of relationships with students   | Low                                | -0.74           | <0.001  | -0.86           | <0.001  | -0.76            | <0.001  |
|                                          | Medium                             | -0.31           | 0.005   | -0.32           | 0.002   | -0.33            | 0.054   |
|                                          | Strong                             | Ref.            |         | Ref.            |         | Ref.             |         |
| Quality of relationships with colleagues | Low                                | -0.22           | 0.054   |                 |         |                  |         |
|                                          | Medium                             | 0.09            | 0.404   |                 |         |                  |         |
|                                          | Strong                             | Ref.            |         |                 |         |                  |         |
| Quality of relationships with superiors  | Low                                | -0.43           | <0.001  | -0.45           | 0.001   | -0.73            | <0.001  |
|                                          | Medium                             | -0.16           | 0.167   | -0.25           | 0.031   | -0.33            | 0.060   |
|                                          | Strong                             | Ref.            |         | Ref.            |         | Ref.             |         |
| Organization / career perspectives       |                                    |                 |         |                 |         |                  |         |

|                      |                          | France  |         | Québec  |         | Belgium |         |
|----------------------|--------------------------|---------|---------|---------|---------|---------|---------|
| % Life satisfaction# |                          | 22.1%   |         | 42.6%   |         | 29.2%   |         |
|                      |                          | $\beta$ | p-value | $\beta$ | p-value | $\beta$ | p-value |
| Autonomy at work     | <i>Little/zero</i>       | -0.87   | <0.001  | -0.89   | <0.001  | -1.25   | <0.001  |
|                      | <i>Some</i>              | -0.54   | <0.001  | -0.10   | 0.304   | -0.43   | 0.002   |
|                      | <i>A lot</i>             | Ref.    |         | Ref.    |         | Ref.    |         |
| Salary               | <i>Unsatisfied (D-F)</i> | -0.77   | <0.001  | -0.41   | <0.001  | -0.43   | 0.002   |
|                      | <i>Satisfied (A-C)</i>   | Ref.    |         | Ref.    |         | Ref.    |         |
| Career progression   | <i>Unsatisfied (D-F)</i> |         |         | -0.43   | <0.001  |         |         |
|                      | <i>Satisfied (A-C)</i>   |         |         | Ref.    |         |         |         |

# Weighted statistics taking into account gender and level of education + age group in France and Belgium

\*Covariates that were not selected by the forward stepwise logistic regression procedure in any of the 3 country models of life satisfaction: Age of students, Seniority, Union membership, School sector / School size, School urbanicity, School facilities, Indoor air quality / Witness of violence / Teamwork, Communication, Societal appreciation, Continuing education
